# Supplementary material for: Structure and electrochemical performance modulation of a LiNi0.8Co0.1Mn0.1O2 cathode material by anion and cation co-doping for lithium ion batteries
Source: Royal Society of Chemistry journal article supplement (doi:10.1039/c9ra07873h), 2019-01-01
Supplement: c9ra07873h1.pdf [file c9ra07873h1.pdf]

**Structure and electrochemical performance modulation of  
 $\text{LiNi}_{0.8}\text{Co}_{0.1}\text{Mn}_{0.1}\text{O}_2$  cathode material by anion and cation co-doping  
for lithium ion battery**

Rong Li<sup>a</sup>, Yong Ming<sup>a</sup>, Wei Xiang<sup>b</sup>, Chunliu Xu<sup>a</sup>, Guilin Feng<sup>a</sup>, Yongchun Li<sup>a</sup>,  
Yanxiao Chen<sup>a</sup>, Zhenguo Wu<sup>a\*,c</sup>, Benhe Zhong<sup>a</sup>, Xiaodong Guo<sup>a,d</sup>

<sup>a</sup> *College of Chemical Engineering, Sichuan University, Chengdu 610065, P. R. China;*

<sup>b</sup> *College of Materials and Chemistry & Chemical Engineering, Chengdu University of  
Technology, Chengdu, 610059, PR China;*

<sup>c</sup> *State Key Laboratory of Physical Chemistry of Solid Surfaces, College of Chemistry and  
Chemical Engineering, Xiamen University, Xiamen, 361005 (PR China);*

<sup>d</sup> *Institute for Superconducting and Electronic Materials, University of Wollongong, Wollongong,  
NSW 2522, Australia;*

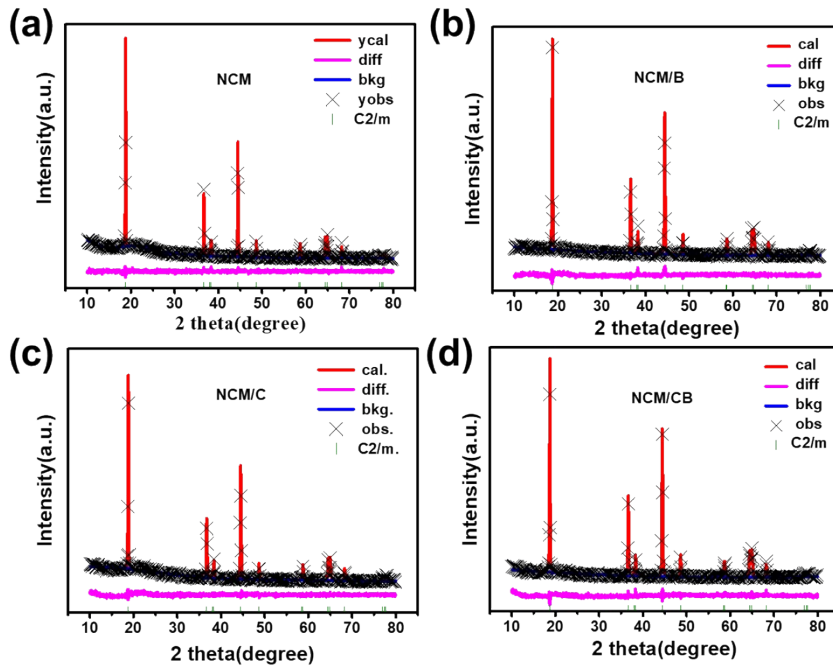

Fig.S1 Rietveld refinement results of NCM(a), NCM/B(b), NCM/C(c) and NCM/CB(d)

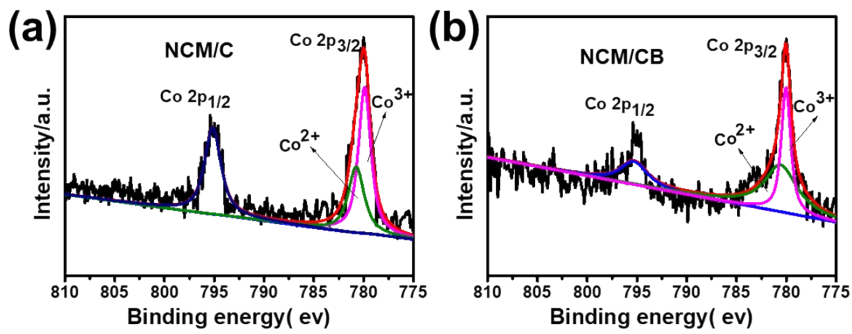

Fig.S2 XPS spectra of Co for (d) NCM/C and (f) NCM/CB.

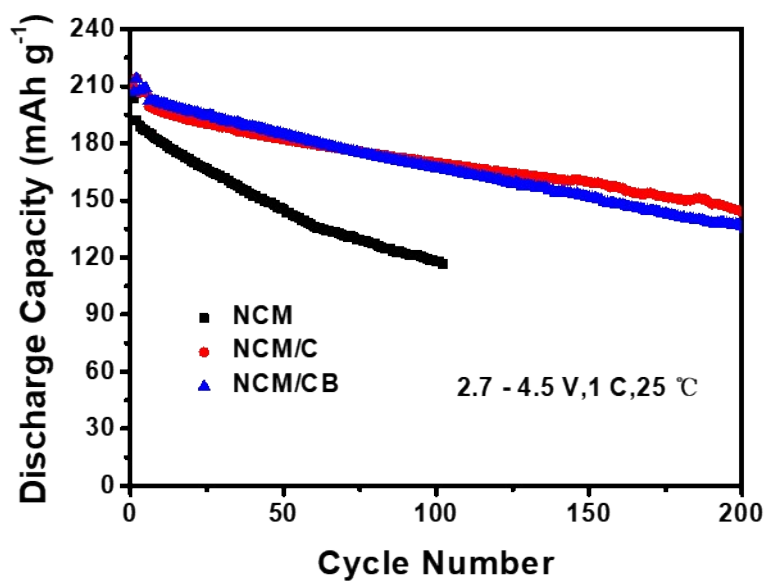

Fig.S3 cycle performance at high voltage

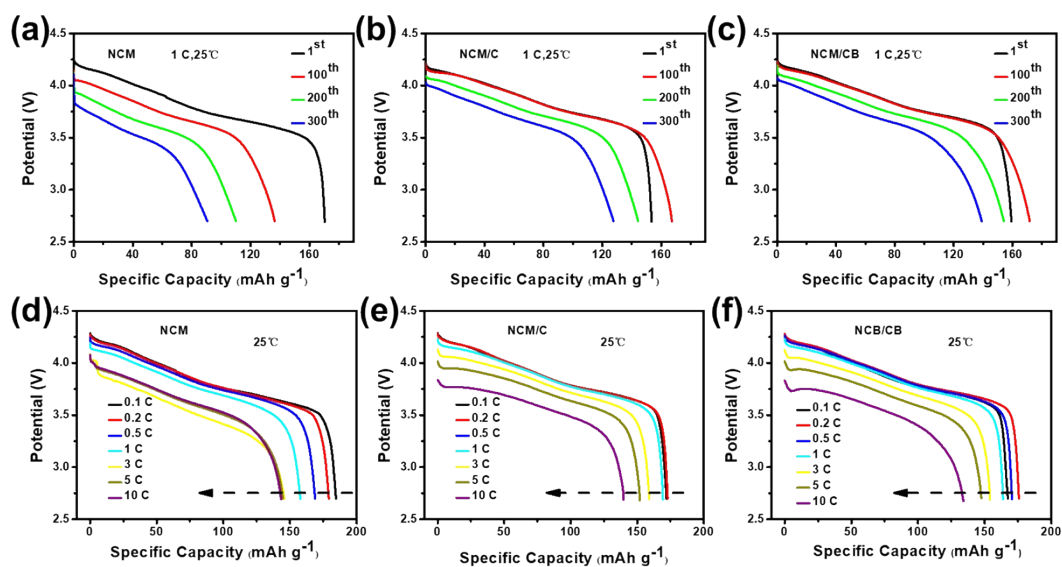

Fig.S4 The Corresponding charge/discharge curves at the 1st, 5th, 50th and 100th cycle for NCM(a), NCM/C(b) and NCM/CB(c). The rate discharge curves between 0.1-10 C of NCM(d), NCM/C(e) and NCM/CB(f).
